# Supplementary material for: Electropolymerization of triphenylamine–dithiafulvene hybrid extended pi-conjugated systems
Source: Royal Society of Chemistry journal article supplement (doi:10.1039/b819675c), 2009-01-01
Supplement: b819675c.pdf [file b819675c.pdf]

## SUPPLEMENTARY DATA

### Electropolymerization of Triphenylamine-Dithiafulvene Hybrid Extended $\pi$ -Conjugated Systems

*Nicolas Cocherel, Philippe Leriche,\* Emilie Ripaud, Nuria Gallégo-Planas, Pierre Frère and Jean Roncali*

Université d'Angers, CNRS, CIMA, Group Linear Conjugated Systems, Department of Chemistry, 2 Boulevard Lavoisier, 49045 Angers, France

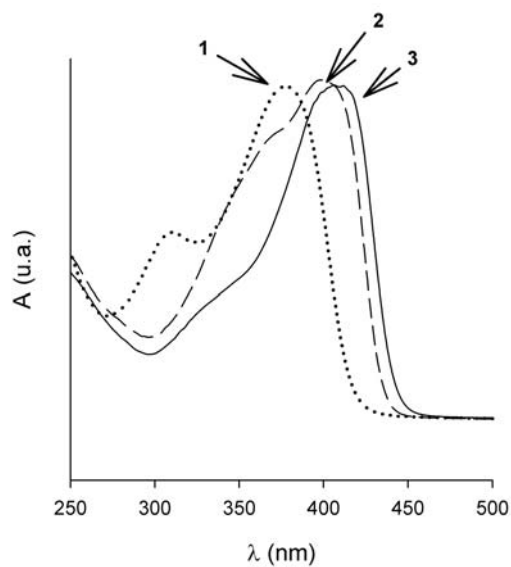

Figure S1: UV-vis spectra of derivatives **1a** (dotted line), **2** (dashed line) and **3** (line) in methylenechloride

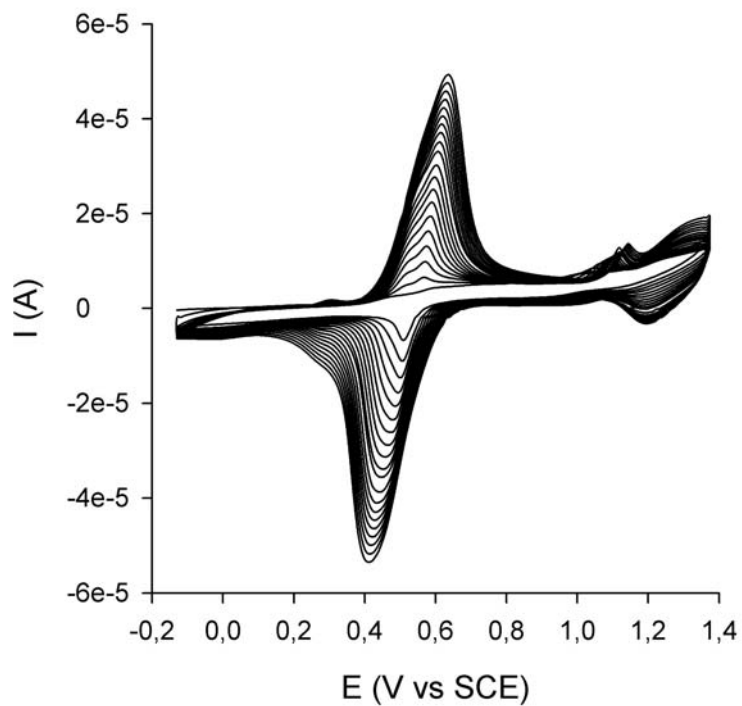

Figure S2: Potentiodynamic electropolymerization of **4** in  $\text{CH}_2\text{Cl}_2$   $\text{Bu}_4\text{NPF}_6$  0.1M 100mV/s

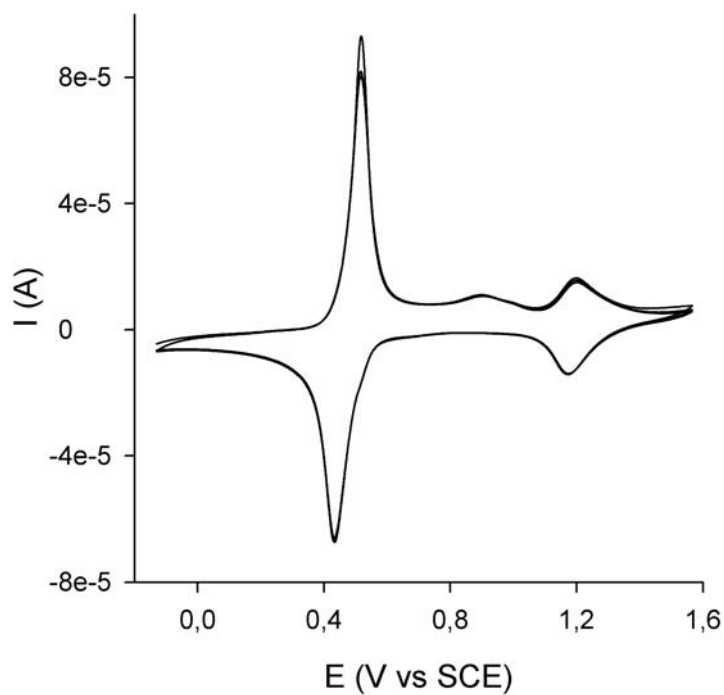

Figure S3: CV trace of poly(**4**) deposited on Pt in  $\text{CH}_3\text{CN}$   $t\text{-Bu}_4\text{NPF}_6$  0.1M 100mV/s

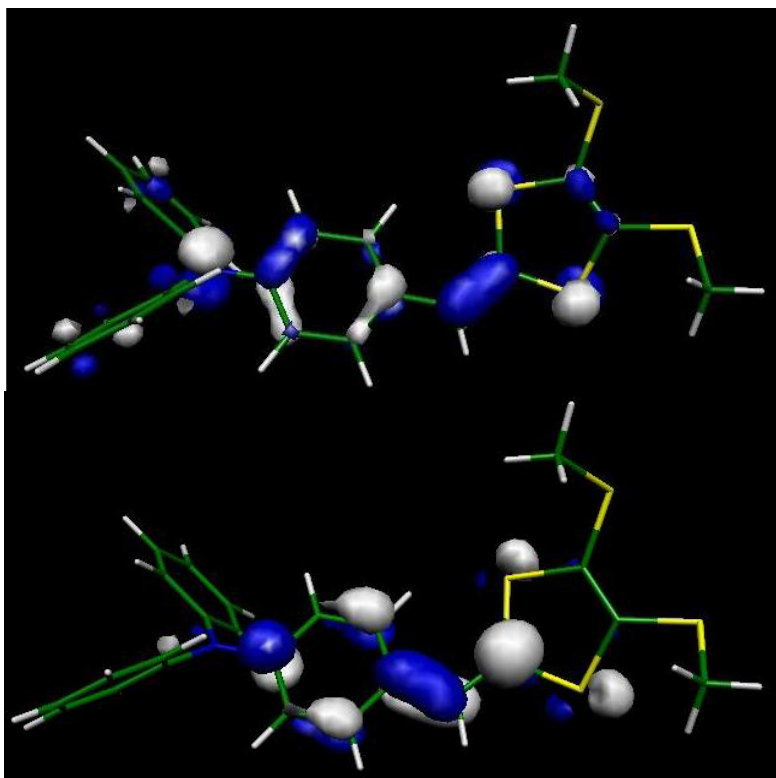

Figure S4: Calculated HOMO (top) and LUMO (bottom) levels for compound 1.
